# Supplementary material
Source: PubMed Central journal article supplement (PMC8117524)

**Supplementary Table 1.** Dimensions of cells grown overnight in nutrient-rich or -poor media, as analyzed by cryoEM. The small number of PE577 cells in M9 is due to both the low cell density of these cultures and the hyper-elongation of some cells that exceeded the field of view.

|                          | CFS100 in LB    | PE577 in LB     | CFS100 in M9    | PE577 in M9     |
|--------------------------|-----------------|-----------------|-----------------|-----------------|
| Length ( $\mu\text{m}$ ) | $2.11 \pm 0.26$ | $3.39 \pm 0.35$ | $2.40 \pm 0.87$ | $4.31 \pm 0.66$ |
| Width ( $\mu\text{m}$ )  | $1.02 \pm 0.09$ | $0.98 \pm 0.07$ | $0.87 \pm 0.04$ | $0.92 \pm 0.07$ |
| Approx $\mu\text{m}^2$   | $2.14 \pm 0.27$ | $3.33 \pm 0.51$ | $2.08 \pm 0.38$ | $3.95 \pm 0.95$ |
| No. cells                | 7               | 6               | 10              | 3               |

**Supplementary Table 2.** A list of all pseudogenes in the PE577 genome.

**Supplementary Table 3.** A list of all pseudogenes in the 2457T (CFS100) genome.

**Supplementary Figure 1.** Representative cryo-electron micrographs of cells grown overnight in nutrient-rich vs. -poor media.

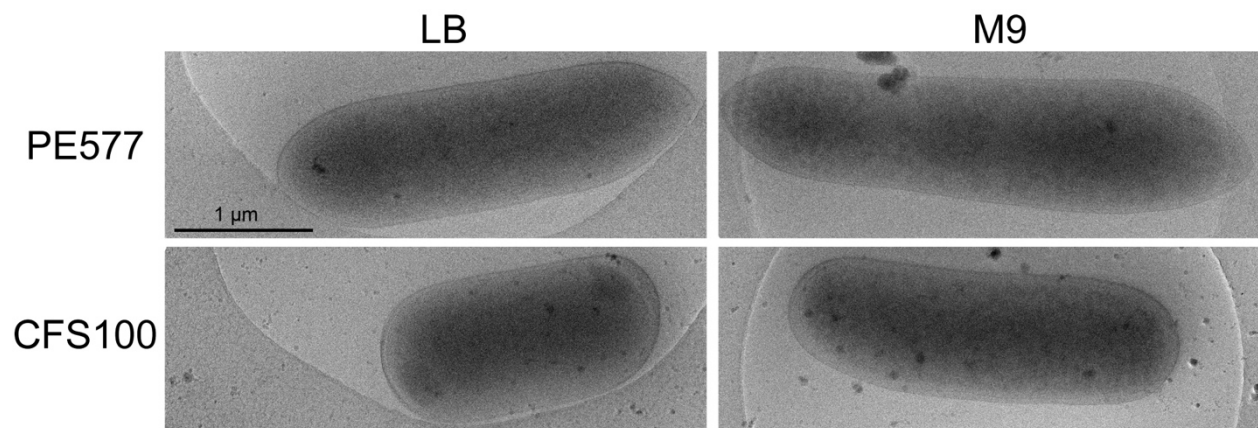

Supplement: JB.00056-21-s0001.pdf [file JB.00056-21-s0001.pdf]
